# Supplementary material for: SLAMF receptors negatively regulate B cell receptor signaling in chronic lymphocytic leukemia via recruitment of prohibitin-2
Source: PubMed Central journal article supplement (PMC8024197; doi:10.1038/s41375-020-01025-z), 2020-08-21
Supplement: 41375_2020_1025_MOESM2_ESM.pdf [file 41375_2020_1025_MOESM2_ESM.pdf]

Supplementary table 1: Antibodies used in flow cytometry

| <b>antigen-fluorochrome</b> | <b>manufacturer</b> | <b>clone</b> | <b>order number</b> |
|-----------------------------|---------------------|--------------|---------------------|
| SLAMF1-PE                   | BD Pharmingen       | A12          | 559592              |
| SLAMF7-AF647                | BD Pharmingen       | 235614       | 564338              |
| CD5-PC5.5                   | Beckman Coulter     | BL1a         | A70203              |
| CD19-PC7                    | Beckman Coulter     | J3-119       | IM3628U             |
| CD45-ECD                    | Beckman Coulter     | J33          | A07784              |
| CD107a-PE/Cy7               | Bio Legend          | H4A3         | 328618              |
| CD3-FITC                    | Beckman Coulter     | UCHT1        | IM2181U             |
| CD56-PE                     | Beckman Coulter     | N901         | A07788              |
| SLAMF1-FITC                 | Bio Legend          | A-12 7D4     | 306306              |
| SLAMF7-FITC                 | Bio Legend          | 162.1        | 331818              |
| IgM-FITC                    | Beckman Coulter     | SA-DA4       | 2040-02             |
| IgG-FITC                    | Southern Biotech    | polyclonal   | B30655              |

Supplementary table 2: Antibodies used in immunoblotting

| <b>antigen</b>      | <b>manufacturer</b> | <b>clone</b> | <b>order number</b> |
|---------------------|---------------------|--------------|---------------------|
| EAT2                | abcam               | polyclonal   | ab67417             |
| GAPDH               | Santa Cruz          | 6C5          | sc-32233            |
| CD79a               | abcam               | EP3618       | ab79414             |
| PHB2                | Santa Cruz          | A-2          | sc-133094           |
| Akt                 | Cell Signaling      | polyclonal   | 9272                |
| pAkt (T308)         | Cell Signaling      | polyclonal   | 9275                |
| Erk1/2              | Cell Signaling      | L34F12       | 4696                |
| pErk1/2 (T202/Y204) | Cell Signaling      | polyclonal   | 9101                |
