# Supplementary material for: SLAMF receptors negatively regulate B cell receptor signaling in chronic lymphocytic leukemia via recruitment of prohibitin-2
Source: PubMed Central journal article supplement (PMC8024197; doi:10.1038/s41375-020-01025-z), 2020-08-21

### Supplementary Figure 3

JVM3 – M-CLL model

Hg3 – U-CLL model

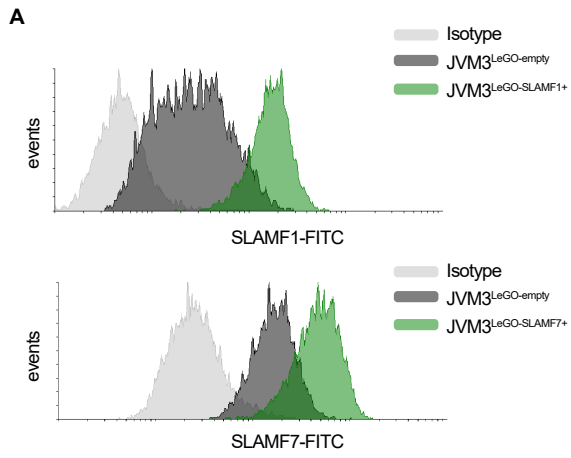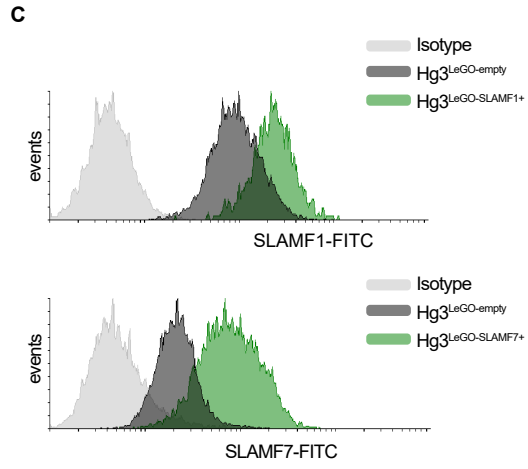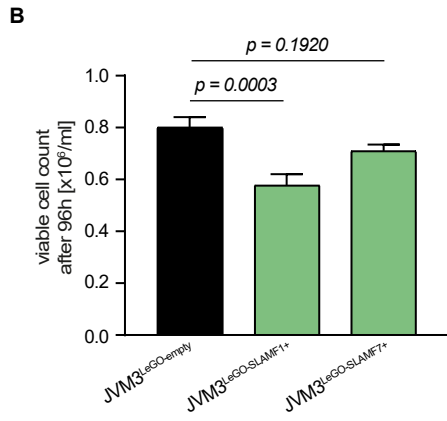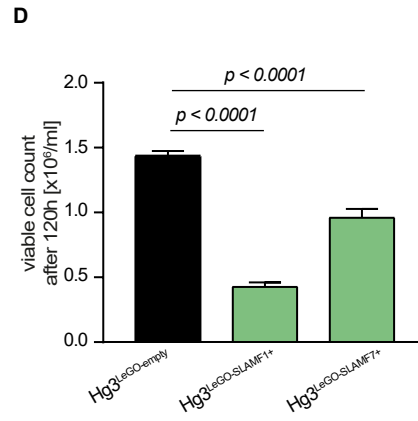

Supplement: 41375_2020_1025_MOESM5_ESM.pdf [file 41375_2020_1025_MOESM5_ESM.pdf]
