# Supplementary material for: SLAMF receptors negatively regulate B cell receptor signaling in chronic lymphocytic leukemia via recruitment of prohibitin-2
Source: PubMed Central journal article supplement (PMC8024197; doi:10.1038/s41375-020-01025-z), 2020-08-21

## Supplementary Figure 4

JVM3 – M-CLL model

A

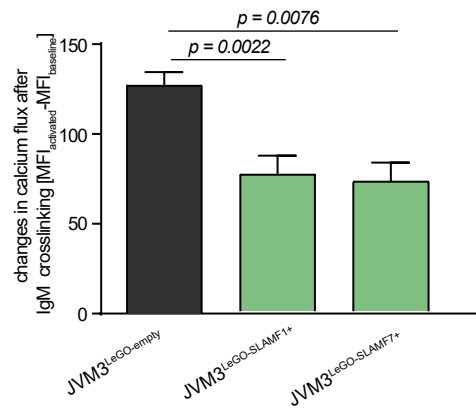

B

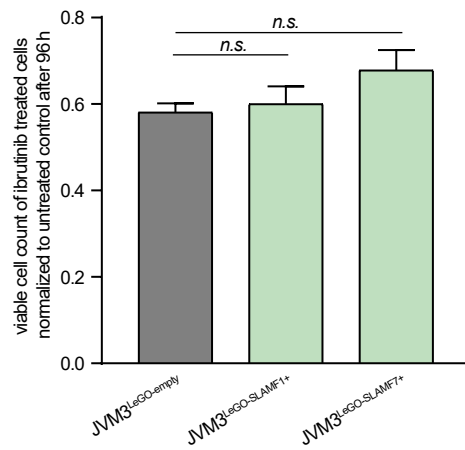

Hg3 – U-CLL model

C

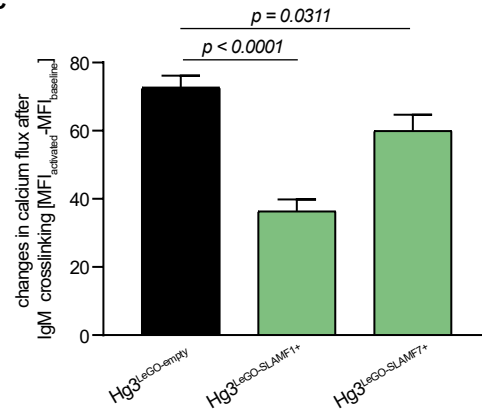

D

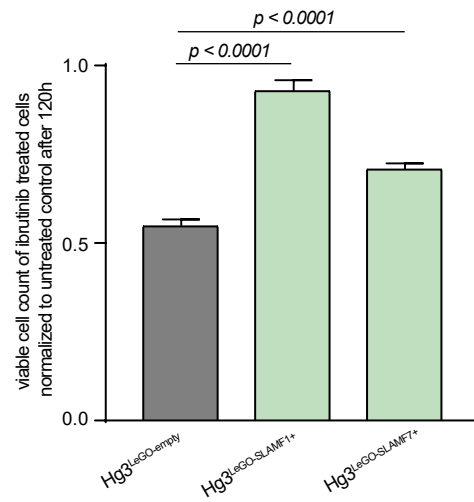

Supplement: 41375_2020_1025_MOESM6_ESM.pdf [file 41375_2020_1025_MOESM6_ESM.pdf]
